# Supplementary material for: Employing the plasmonic effect of the Ag–graphene composite for enhancing light harvesting and photoluminescence quenching efficiency of poly[2-methoxy-5-(2-ethylhexyloxy)-1,4-phenylene-vinylene]
Source: Royal Society of Chemistry journal article supplement (doi:10.1039/c3cp54241f), 2014-01-01
Supplement: c3cp54241f.pdf [file c3cp54241f.pdf]

# Supplementary Material

Employing plasmonic effect of Ag-graphene composite on enhancing light harvesting and photoluminescence quenching efficiency of poly[2-methoxy-5-(2-ethylhexyloxy)-1,4-phenylene-vinylene]

*Chenxin Ran, Minqiang Wang\*, Weiyin Gao, Zhi Yang, Jianping Deng,*

*Xiaohui Song and Jijun Ding*

Electronic Materials Research Laboratory (EMRL), Key Laboratory of Education Ministry; International Center for Dielectric Research, Xi'an Jiaotong University, Xi'an, 710049, China.

Table S1 The detailed preparation condition of composite

| No.<br>Item                | 1   | 2   | 3   | 4   | 5   | 6   | 7   | 8   | 9   |
|----------------------------|-----|-----|-----|-----|-----|-----|-----|-----|-----|
| MEH-PPV<br>(mL)            | 2   | 2   | 2   | 2   | 2   | 2   | 2   | 2   | 2   |
| Acceptor<br>Materials (mL) | 0.0 | 0.1 | 0.2 | 0.3 | 0.4 | 0.5 | 0.6 | 0.7 | 0.8 |
| Ethanol (mL)               | 0.8 | 0.7 | 0.6 | 0.5 | 0.4 | 0.3 | 0.2 | 0.1 | 0.0 |
| Total Volume<br>(mL)       | 2.8 | 2.8 | 2.8 | 2.8 | 2.8 | 2.8 | 2.8 | 2.8 | 2.8 |

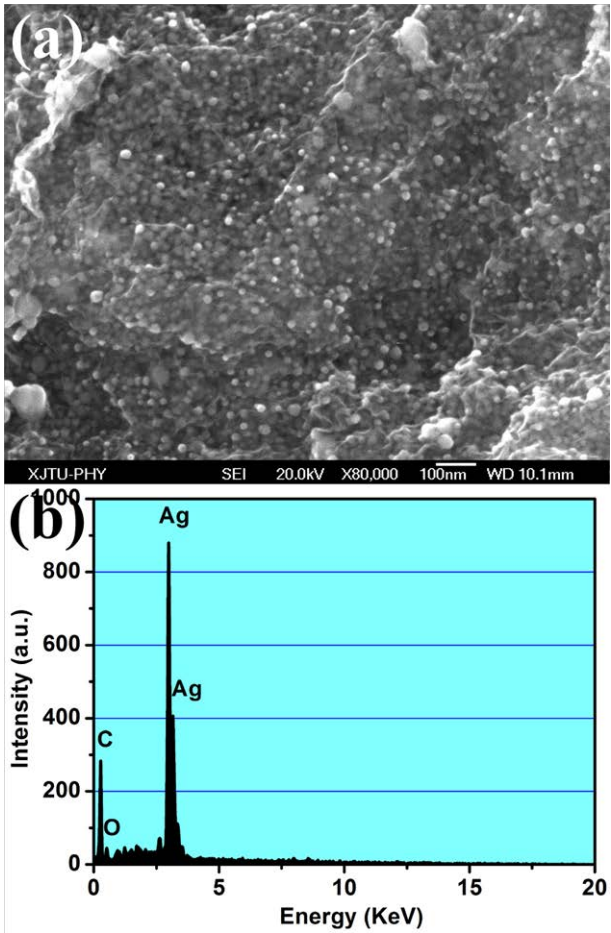

Figure S1 (a) FESEM image of AGC-10. (b) Corresponding EDS pattern of AGC-10.

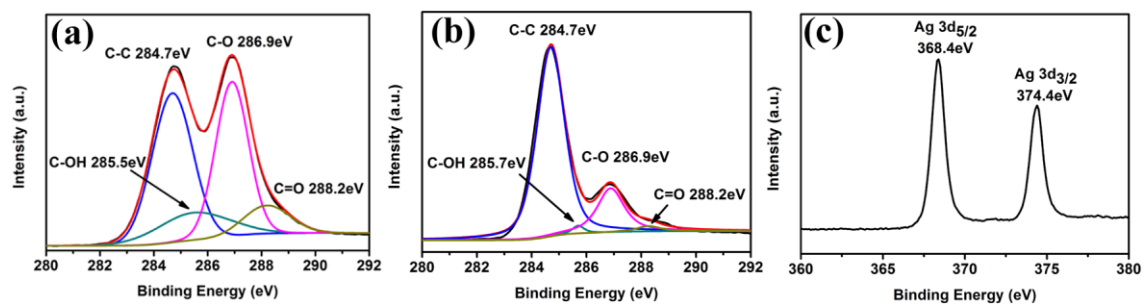

**Figure S2** C1s XPS of (a) GO and (b) AGC-10, (c) Ag 3d XPS of AGC-10.

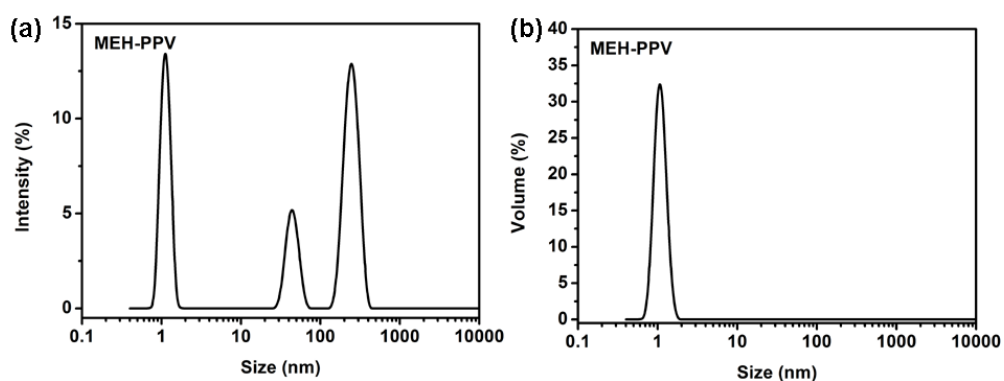

**Figure S3** DLS pattern of MEH-PPV in a mix solvent of chloroform and ethanol in the function of (a) intensity and (b) volume.

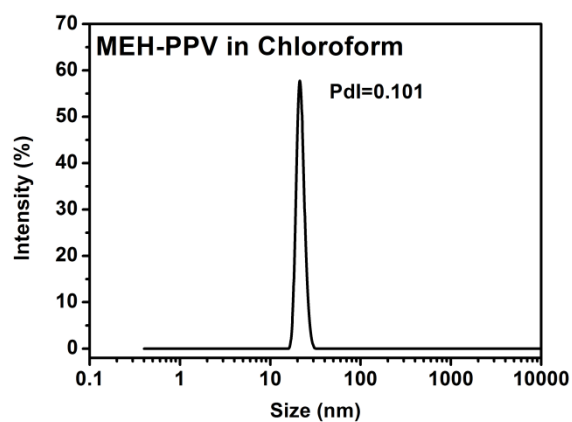

**Figure S4** The DLS result of pure MEH-PPV solution in chloroform.
